# Supplementary material for: The Polycomb group protein CBX6 is an essential regulator of embryonic stem cell identity
Source: PubMed Central journal article supplement (PMC5663739; doi:10.1038/s41467-017-01464-w), 2017-11-01
Supplement: 41467_2017_1464_MOESM1_ESM.pdf [file 41467_2017_1464_MOESM1_ESM.pdf]

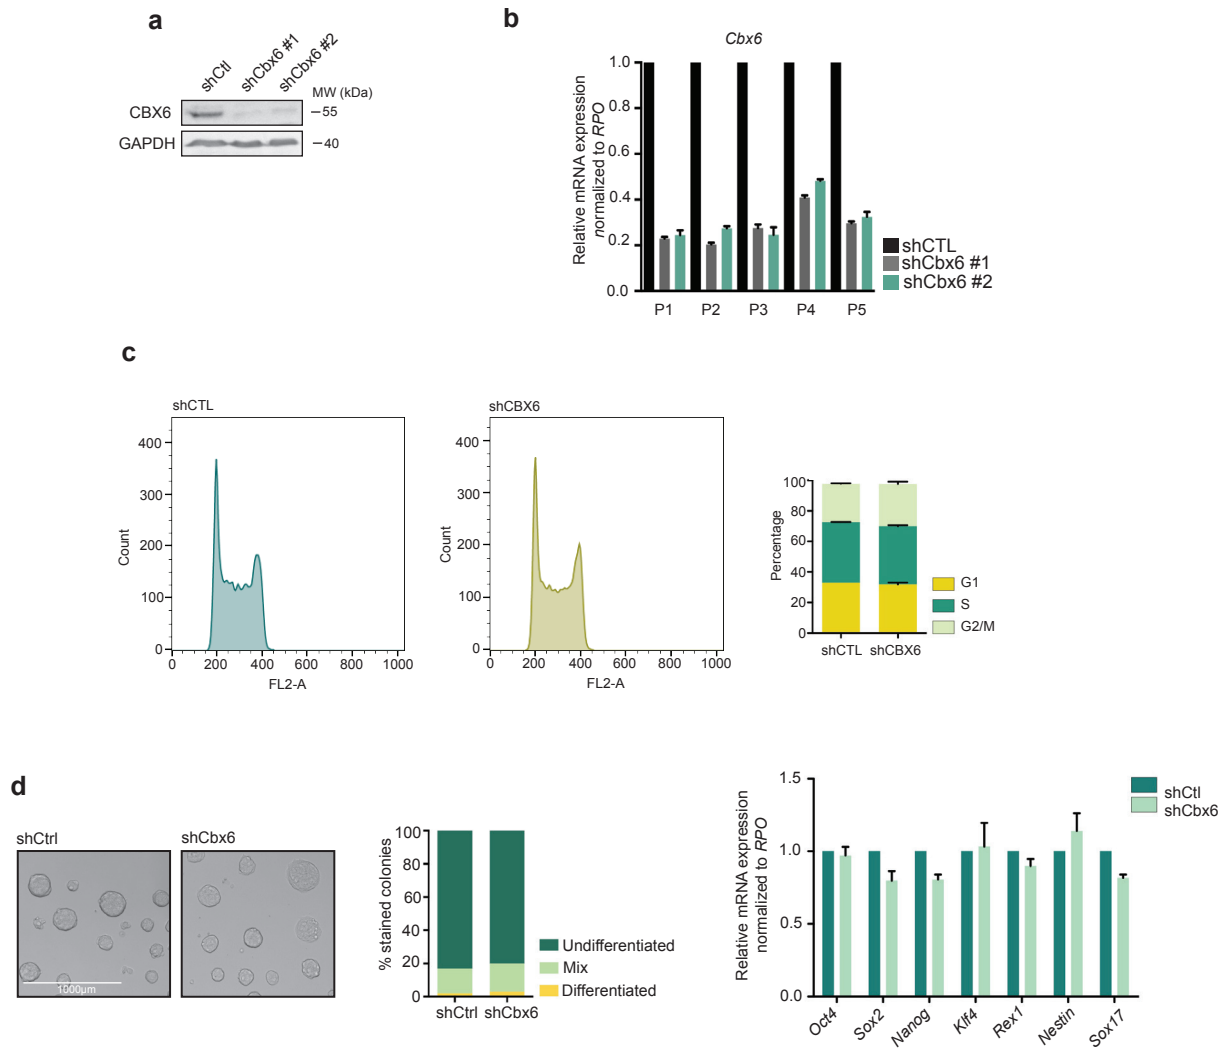

**Supplementary Figure 1.** (a) Western blot analysis of CBX6 in control (shCtrl) and CBX6-depleted (shCbx6#1 and #2) ESCs. GAPDH was used as a protein-loading control. (b) RT-qPCR analysis of CBX6 in control and CBX6-depleted ESCs. Results are shown relative to shCtrl and normalized to *Rpo*. Error bars represent SD of two independent experiments (P, passage). (c) BrdU staining in control (shCtrl) and CBX6-depleted (shCbx6). (d) (left panel) Phase contrast image of shCtrl and shCbx6 ESC lines. (middle panel) Quantification of the AP staining assays, representing the mean of two independent experiments in which around 40 random colonies were counted. (right panel) RT-qPCR analysis of control and CBX6-depleted ESCs. Results are shown relative to shCtrl and are normalized to the housekeeping gene *Rpo*. Error bars represent standard deviation (SD) of two independent experiments.

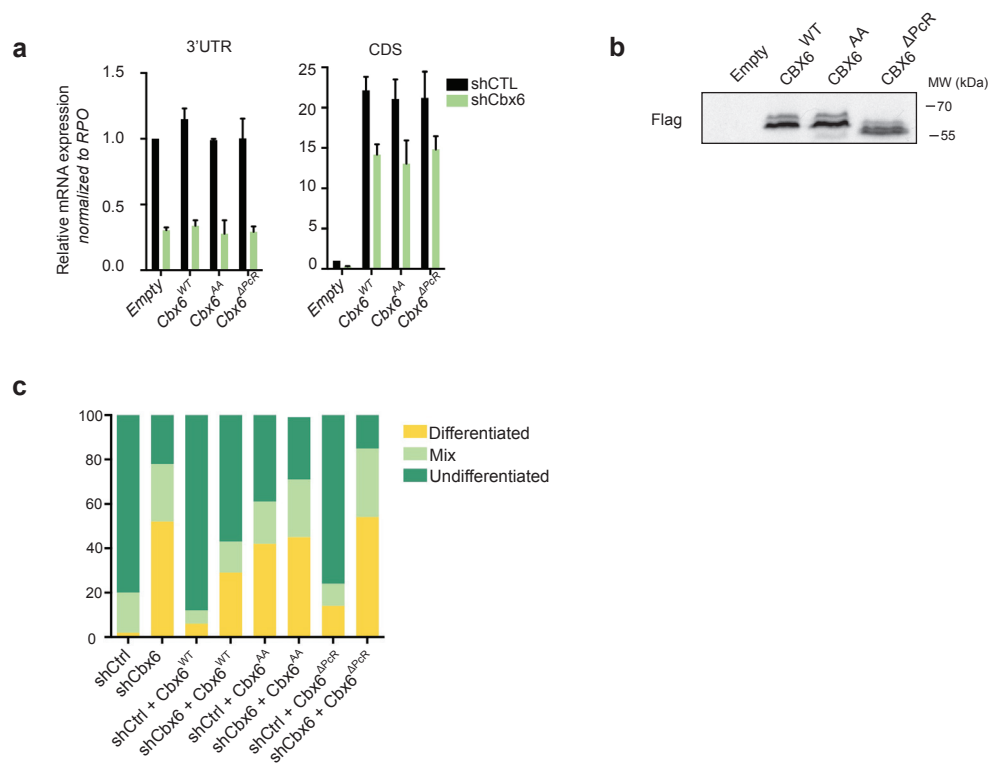

**Supplementary Figure 2.** (a) Western blot analysis of overexpressing CBX6-Flag constructs. (b) RT-qPCR mRNA expression analysis of endogenous CBX6 (3'-UTR) or total CBX6 (CDS, coding sequence) in control (shCtl) and CBX6-depleted ESCs (shCBX6) overexpressing CBX6<sup>WT</sup>, CBX6<sup>AA</sup> or CBX6<sup>ΔPcR</sup> or an empty vector. Results are shown relative to shCtl, and normalized to *Rpo*. Error bars represent SD of two independent experiments. (c) Quantification of the AP staining assays, representing the mean of two independent experiments in which about 40 random colonies were counted.

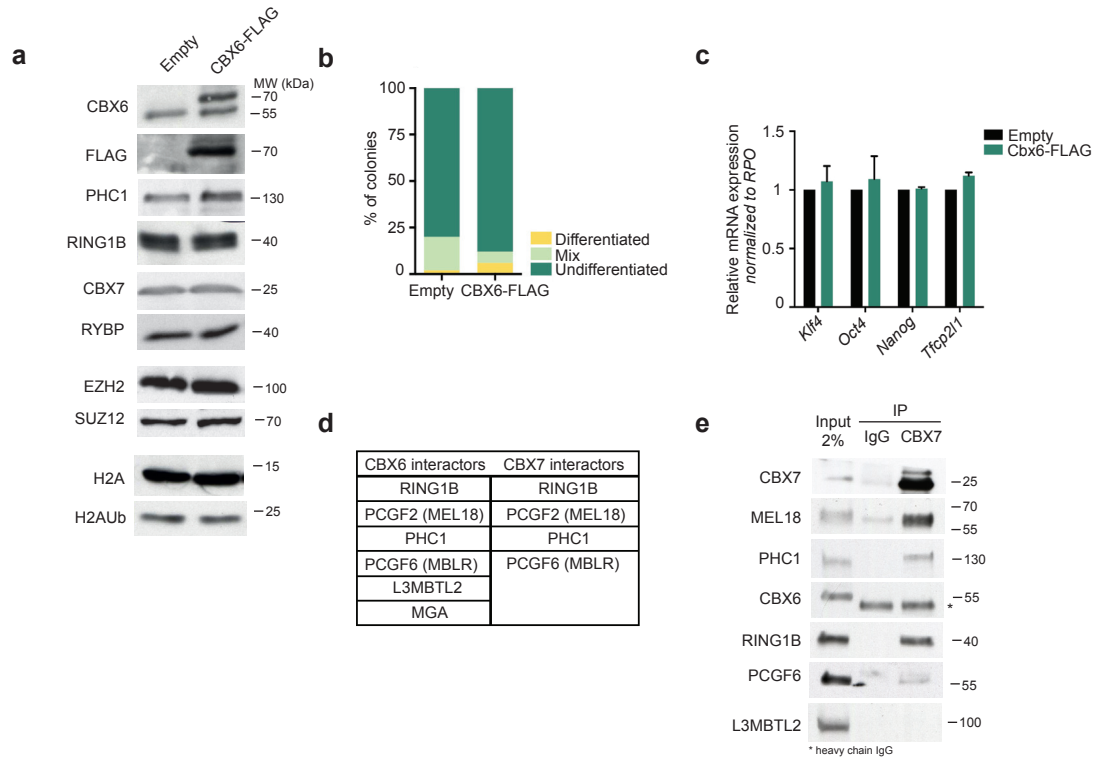

**Supplementary Figure 3.** (a) Western blot analysis of PRC1 subunits (PHC1, RING1B, MEL18, CBX7 and RYBP), PRC2 (EZH2 and SUZ12) and H2A/H2Aub, in control (empty) and CBX6-FLAG overexpressing cell lines. (b) Quantification of the AP staining assays, representing the mean of three independent experiments in which around 100 random colonies were counted. (c) RT-qPCR analysis of control and CBX6-depleted ESCs. Results are shown relative to shCtl and normalized to the housekeeping gene *Rpo*. Error bars represent standard deviation (SD) of two independent experiments. (d) Comparative table between CBX6 and CBX7 interactors. CBX7 information was extracted from Tavares et al.<sup>9</sup> (e) Co-IPs from total ESC extracts using an antibody against CBX7. Western blots of different proteins are shown.

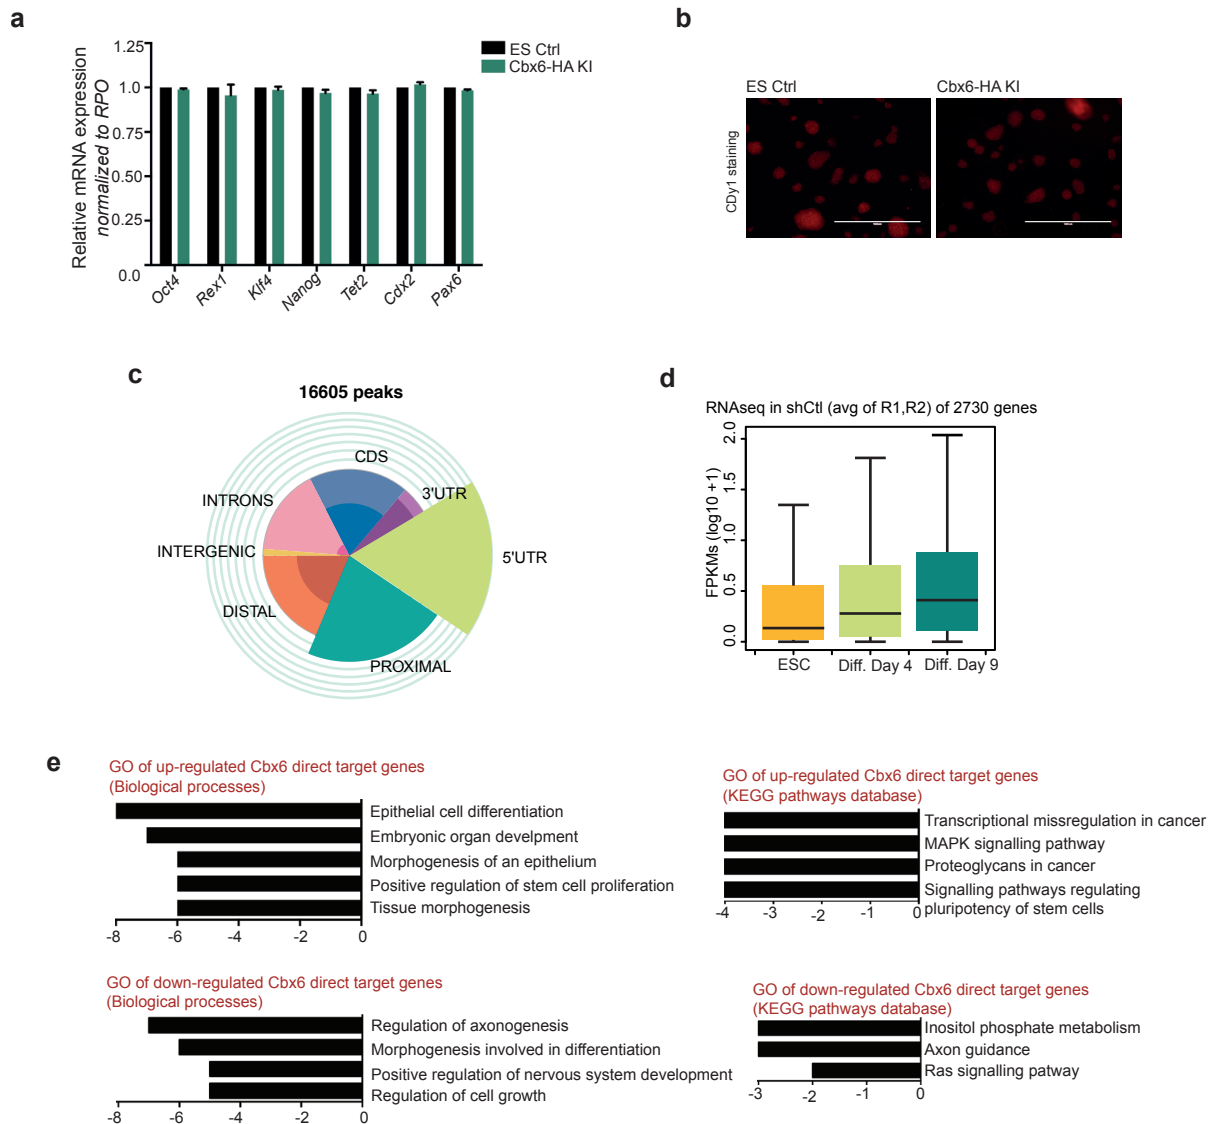

**Supplementary Figure 4.** (a) qRT-PCR analysis of control and CBX6-3×HA knockin ESCs. Results are shown relative to control and normalized to Rpo. Error bars represent SD of two independent experiments. (b) CDy1 staining of controlCBX6-HA knockin ESCs. (c) Genomic distribution of ChIPseq peaks of Cbx6 compared to the whole genome. Spie chart that superimposes two different pie charts. The base pie chart represents the distribution of Cbx6 peaks fitting on each class of genomic region (background image). The second pie chart displays the same categories with the radius corrected by the genome-wide distribution of each gene feature (foreground image). DISTAL region is the region within 2.5 Kbp and 0.5 Kbp upstream of the TSS. PROXIMAL region is the region within 0.5 Kbp and the TSS. UTR is UnTRanslated sequence. CDS is the protein CoDing Sequence. INTRONS are intronic regions. INTERGENIC is the rest of the genome. TSS is the Transcription Start Site (d) UCSC genome browser representation of CBX6 ChIP-seq signal at two representative genomic regions from ESCs expressing an empty vector or CBX6-HA. (e) GO analysis of genes deregulated following CBX6 knockdown; *P* values are plotted in  $-\log$ .

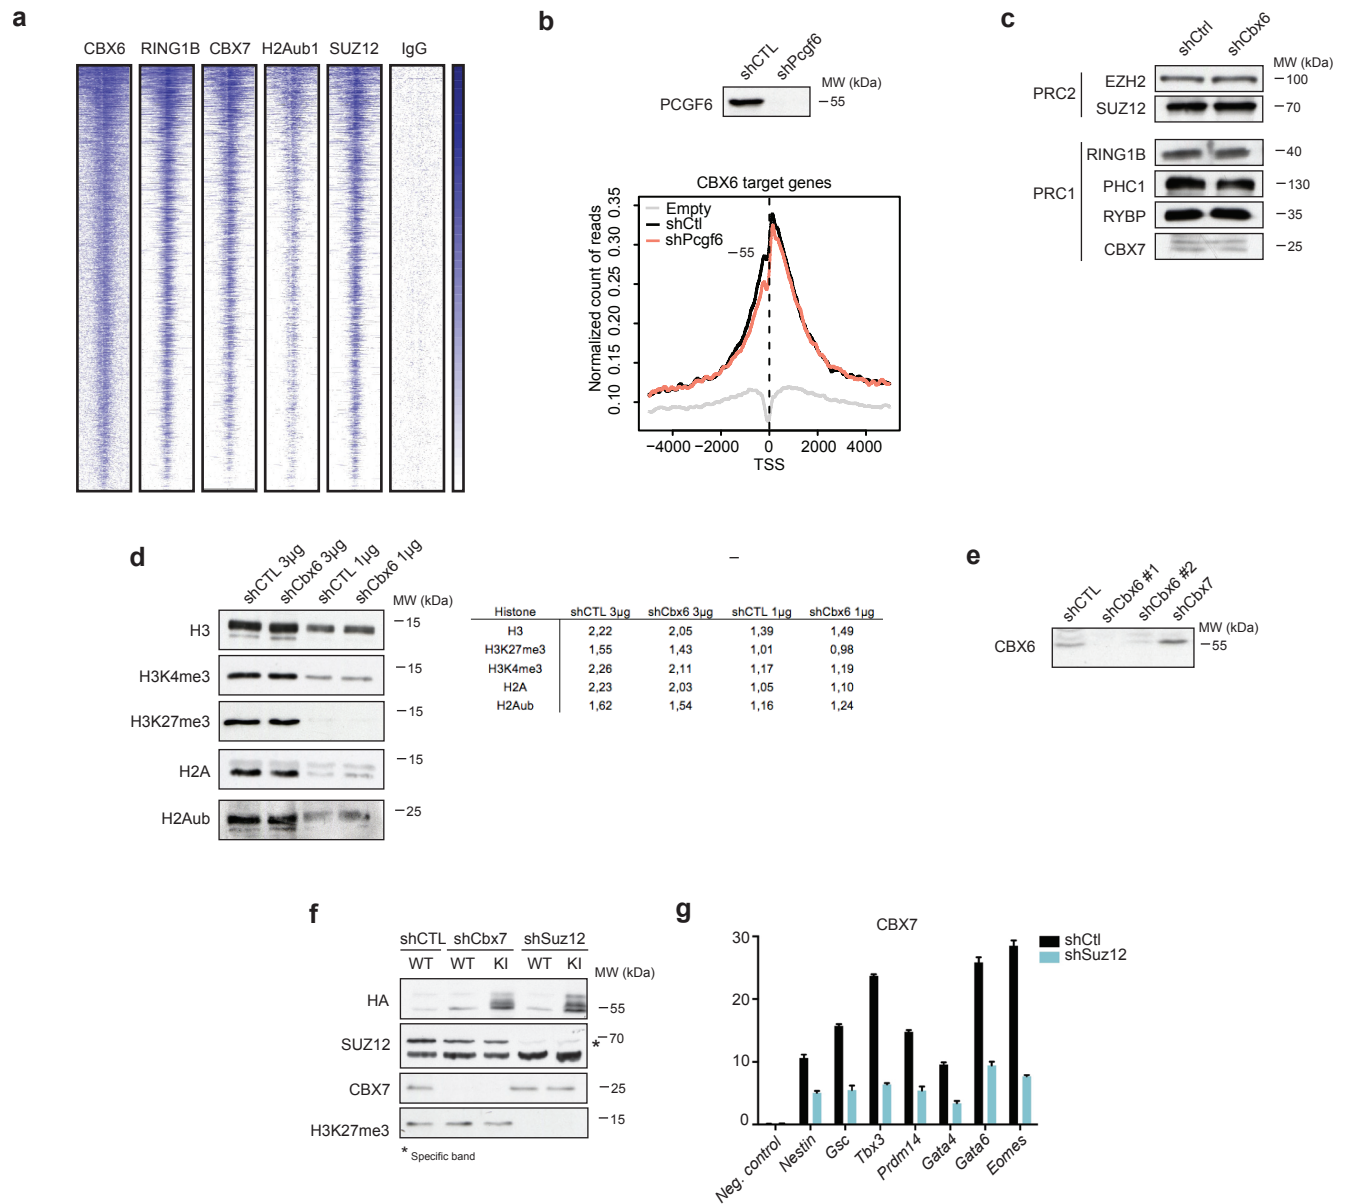

**Supplementary Figure 5.** (a) ChIPseq heatmaps of CBX6, RING1B, CBX7, H2AK119ub, SUZ12 and IgG. Target genes were defined by the presence of one or more CBX6 peak within  $\pm 2.5$  kb of a given transcriptional start site (TSS). (b) (up) Western blot analysis of PCGF6 in shCtl and shPcrgf6 ESCs. (down) TSS ( $\pm 5$  kb) enrichment plot of CBX6 ChIP-seq in shCtl and shPcrgf6 ESCs. (c) Western blot analysis of PRC2 (EZH2 and SUZ12) and PRC1 (RING1B, PHC1, RYBP, CBX7 and PCGF2) from either shCtl or shCBX6 ESCs. (d) Western blot analysis and quantification of histone modifications in shCtl and shCbx6 ESCs. (e) Western blot analysis of CBX6 in shCtl, shCbx6 and shCbx7 in ESCs (f) Western blot analysis of CBX6, SUZ12, CBX7 and H3K27me3 in shCtl and shSuz12 ESCs. (g) ChIP-qPCR of CBX7 in shCTL and shSuz12 ESCs. An intergenic region was used as a negative control gene. Results are shown relative to percentage of input. Error bars represent SD of two biological replicates

Figure 3c

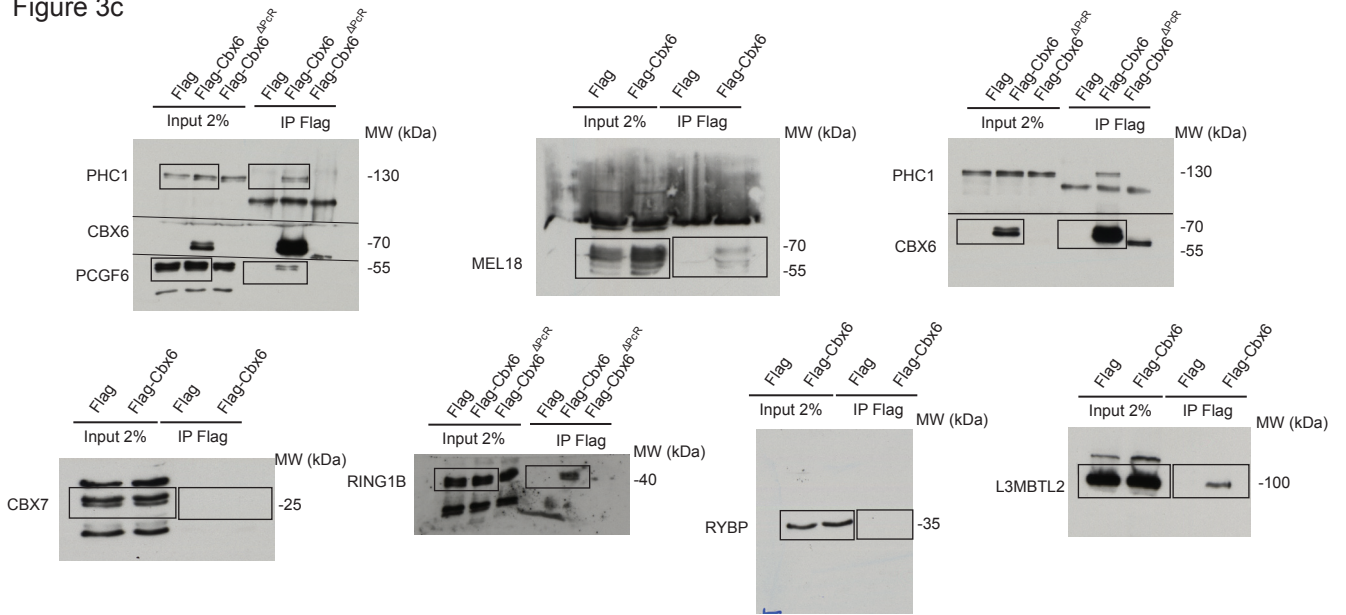

Figure 3d

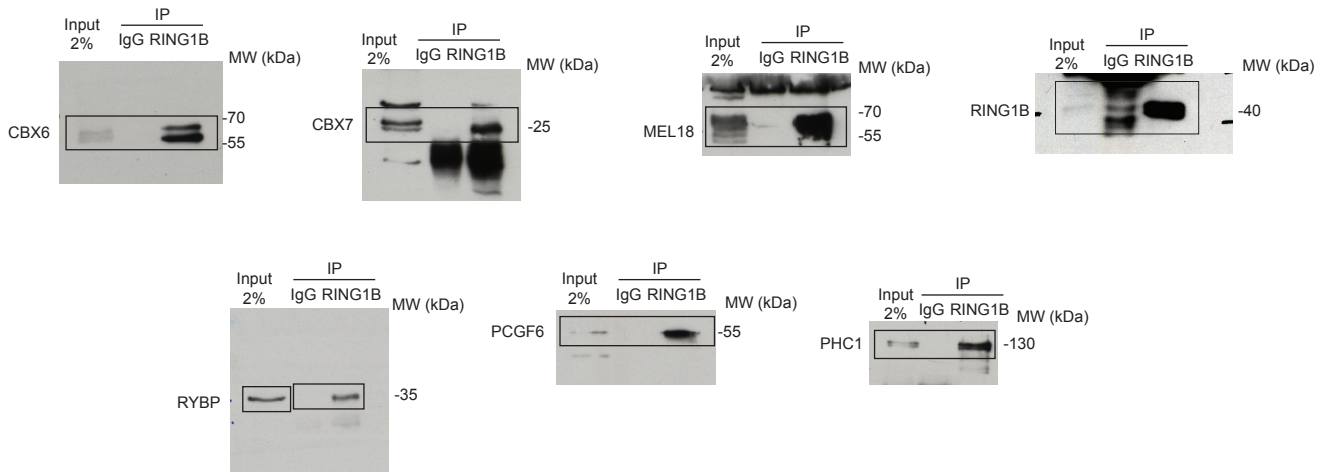

Supplementary Figure 6. Uncropped western blots related to Figure 3.

| <b>Antibodies</b> | <b>Specie</b> | <b>Provider</b> | <b>Reference</b> | <b>ChIP</b> | <b>IP</b> | <b>WB</b> |
|-------------------|---------------|-----------------|------------------|-------------|-----------|-----------|
| Cbx6              | Rabbit pAb    | In house        |                  |             |           | 1/1000    |
| Cbx7              | Rabbit pAb    | Abcam           | ab21873          | 5ug         |           | 1/500     |
| Ezh2              | Mouse mAb     | In house        |                  |             |           | 1/2000    |
| Flag              | Mouse mAb     | Sigma           | A2220            |             | 5ug       | 1/1000    |
| Gapdh             | Mouse mAb     | Santa Cruz      | SC-32233         |             |           | 1/5000    |
| HA                | Rabbit pAb    | BioLegend       | 902301           | 5ul         |           | 1/2000    |
| HA                | Mouse mAb     | In house        |                  |             |           | 1/100     |
| H2A               | Rabbit pAb    | Abcam           | ab18255          | 3ul         |           | 1/5000    |
| H2AK119Ub         | Rabbit pAb    | Cell Signaling  | 8240s            | 5ul         |           | 1/5000    |
| H3                | Rabbit pAb    | Abcam           | ab1791           | 2ug         |           | 1/5000    |
| IgG               | Rabbit pAb    | Abcam           | ab46540          | 5ug         | 5ug       |           |
| Mel18             | Rabbit pAb    | Santa Cruz      | sc 10744         | 5ug         | 5ug       | 1/2000    |
| Pcgf6             | Rabbit pAb    | Dr. Pasini lab  |                  | 5ug         | 2ug       | 1/1500    |
| Phc1              | Mouse mAb     | Active motif    | 39723            | 5ug         | 5ug       | 1/2000    |
| Ring1B            | Rabbit pAb    | In house        |                  | 8ul         |           | 1/2000    |
| Ring1B            | Mouse mAb     | MBL             | D139-3           |             | 5ug       |           |
| Rybp              | Rabbit pAb    | Millipore       | 3637             | 5ug         | 5ug       | 1/2000    |
| Suz12             | Rabbit pAb    | Abcam           | ab12073-100      | 5ug         |           | 1/2000    |
| L3mbtl2           | Rabbit pAb    | Sigma           | HPA000815        |             |           | 1/100     |

Supplementary Table 1. List of antibodies used and their application.

| Gene        | Primers 5'-3'                                           |
|-------------|---------------------------------------------------------|
| <b>ChIP</b> |                                                         |
| EOMES       | Fw GCGCAGGGAATCTTAACTG<br>Rv AAGACCCAACATGAGCCTGA       |
| Gata4       | Fw TCTCCAGCACCCATCAGTTT<br>Rv TTCTGGGAAACTGGAGCTGG      |
| Gata6       | Fw TCTTCCTGCTCTCCCCTTTG<br>Rv CACAAACCGCCTTACAACCA      |
| Gsc         | Fw GCCAGGTGAGTAAAGCAAGC<br>Rv GCCTGGGCTACAACAGCTAC      |
| Nestin      | Fw CTCGGGAGAGTCGCTTAGAG<br>Rv GCTTGGTTTTACCAGGGACA      |
| Prdm14      | Fw GTGTCACCCGACTGAAAGGT<br>Rv GTTCGTTTTGTTGGGCTGAT      |
| Tbx3        | Fw GGCTGACTGTTGACGTTTGA<br>Rv CGGTCTCCTTCAATGGAAAA      |
| <b>mRNA</b> |                                                         |
| Cbx6        | Fw GCCGAATCCATCATTAACG<br>Rv TTGGGTTTAGGTCCCCTCTT       |
| Cbx7        | Fw AGCCTCGGGGTATAGGAAGA<br>Rv CGGTGATGTCAGTCACGGTA      |
| Esrrb       | Fw GCGTTCTTCAAGAGAACCA<br>Rv TCCGTTTGGTGTCTCACAT        |
| Klf4        | Fw CAGCCATGTCAGACTCGCC<br>Rv GTTTTTAATCTTCGTTGACTTTGGG  |
| Nanog       | Fw AGGCTGATTTGGTTGGTGTC<br>Rv CCAGGAAGACCCACACTCAT      |
| Nestin      | Fw TCCCCTGAGGACCAGGAGT<br>Rv GTCTCAGGACAGTGCTGAGCCTTC   |
| Nr0b1       | Fw TCCAGGCCATCAAGAGTTTC<br>Rv ATCTGCTGGGTTCTCCACTG      |
| Oct4        | Fw GAGGAGTCCCAGGACATGAA<br>Rv AGATGGTGGTCTGGCTGAAC      |
| Rest        | Fw GTGCGAACTCACACAGGAGA<br>Rv AAGAGGTTTAGGCCCGTTGT      |
| Rpo         | Fw TTCATTGTGGGAGCAGAC<br>Rv CAGCAGTTTCTCCAGAGC          |
| Sox2        | Fw CTGCAGTACAACTCCATGACCAG<br>Rv GGA CTTGACCACAGAGCCCAT |
| Tcfcp2l1    | Fw AGCATCATCCGTGTCGTTTT<br>Rv CAGTGCACCTGAATGAATGC      |
| Tet2        | Fw GCCAGAAGCAAGAAACCAAG<br>Rv CCTTCCTCAGACCCAAACA       |

Supplementary Table 2. Mouse primers used for mRNA and ChIP analysis.
